# Supplementary material for: A vertebrate-conserved cis-regulatory module for targeted expression in the main hypothalamic regulatory region for the stress response
Source: PubMed Central journal article supplement (PMC4248439; doi:10.1186/s12861-014-0041-x), 2014-11-27
Supplement: 12861_2014_41_MOESM1_ESM.pdf [file 12861_2014_41_MOESM1_ESM.pdf]

**A) ECR1**

Hs-ECR1 CTGACATTTGCAGGCTGCCCTCCTGATTGGTCCCCTCGCCGAGCTGCTCACGGGTTCATT  
 Cm-ECR1 CTGACATTTGCAGCGTTGGGTTTTGATTGGCCCTGATTTGGAGCTGCTCATGGGTCATT  
 Lc-ECR1 CTGACATTTGCAGCCTTCCAATCTGATTGGTCTCATTTGGAGCAGCTCATGGGTTCATT  
 Dr-ECR1 CTGACACCTCCAGGCTTCAACGCTGATTGGCTCTTATTTGAAGGAGTCATGGGTTCATT  
 \*\*\*\*\* \* \*\*\* \* \*\*\*\*\* \* \*\* \*\*\*\*\* \*\* \*\*\*\*\*

Hs-ECR1 CAACTGTTAAGCACCTCCCCGTCTCTCTAAAGGACATTATAATGCAAGAAGCCCCCTTTT  
 Cm-ECR1 CAACTGTTAAGCACCCCGTCCCTCTAAAGGAGATTATAATGCAGGAGACCCCTTTT  
 Lc-ECR1 CAACTGTTAAGCACCTCCAGTCTCTCTAAAGGACATTATAATGCAAGAAGCCCCCTTTT  
 Dr-ECR1 CAACTATTAAGCGCCTCCAGTCTCTCTAAAGGACATTATAATGCAAGAAGCCCCCTTTT  
 \*\*\*\*\* \*\*\*\*\* \*\* \*\*\* \*\* \*\*\*\*\* \*\*\*\*\* \*\*\*\*\* \* \*\* \*\*\*\*\*

Hs-ECR1 TAACCACAAACCGAA  
 Cm-ECR1 --ACAACAAACAGAA  
 Lc-ECR1 TAACCACAAACCGAA  
 Dr-ECR1 TAACCACAAACCGAA  
 \*\* \*\*\*\*\* \*\*

|                     |        |                                    |
|---------------------|--------|------------------------------------|
| Sequence 1: Hs-ECR1 | 135 bp | Sequences (1:2) Aligned. Score: 88 |
| Sequence 2: Lc-ECR1 | 135 bp | Sequences (1:3) Aligned. Score: 78 |
| Sequence 3: Dr-ECR1 | 135 bp | Sequences (1:4) Aligned. Score: 80 |
| Sequence 4: Cm-ECR1 | 133 bp | Sequences (2:3) Aligned. Score: 85 |
|                     |        | Sequences (2:4) Aligned. Score: 87 |
|                     |        | Sequences (3:4) Aligned. Score: 78 |

**B) ECR2**

Hs-ECR2 CAGCCAAGTCTAAAC-AGTAGTAAATTAGTACAAATTTATACTGATTTACTCTAATAAT  
 Cm-ECR2 CAGCCAAGTCTAAACCAGGAGTAAATTAGTACACATTTATACTGATTTATTTAATAAT  
 Lc-ECR2 CAGCCAAGTCTAAAC-ACTAGTAAATTAGTACAAATTTATACTGATTTACTCTAATAAT  
 Dr-ECR2 CAGTCAGGCCTAAAC-ACTACTAAATCAGCCCTAATTTATACTGATCTCGC--TAATAAT  
 \*\*\* \*\* \* \*\*\*\*\* \* \* \*\*\*\*\* \*\* \* \*\*\*\*\* \*\*\*\*\* \* \*\*\*\*\*

Hs-ECR2 CGTAATAAAA-GCTTATAGATTTGGCACTAATTACATAAATGCCTAATGATCTTGAAAAAT  
 Cm-ECR2 CGTAATAAAA-GCTTATAGATTTGGCACTAATTAGATAAATGCCTAATGATCTTGAAAAAT  
 Lc-ECR2 CGTAATAAAA-GCTTATAGATTTGGCACTAATTACATAAATGCCTAATGATCTTGAAAAAT  
 Dr-ECR2 CGTAATAAAAAGCTTATAGATTTGGCACTAATTACATAAAGCCCTAATGATGTTGAAAAAT  
 \*\*\*\*\* \*\*\*\*\* \*\*\*\*\* \*\*\*\*\* \*\*\*\*\* \*\*\*\*\* \*\*\*\*\* \*\*\*\*\*

|                     |        |                                    |
|---------------------|--------|------------------------------------|
| Sequence 1: Hs-ECR2 | 118 bp | Sequences (1:2) Aligned. Score: 99 |
| Sequence 2: Lc-ECR2 | 118 bp | Sequences (1:3) Aligned. Score: 88 |
| Sequence 3: Dr-ECR2 | 117 bp | Sequences (1:4) Aligned. Score: 95 |
| Sequence 4: Cm-ECR2 | 119 bp | Sequences (2:3) Aligned. Score: 88 |
|                     |        | Sequences (2:4) Aligned. Score: 94 |
|                     |        | Sequences (3:4) Aligned. Score: 83 |

**C) ECR3**

Hs-ECR3 TGTTTATACTGCTATAAAAAATCAAGACCAATAGAAAAGTCATAAAAATGAAGCGGGCTATC  
 Lc-ECR3 TGTTTATACTGCTATAAAAAATCAAGACCAATAGAAAAGTCATAAAAATGAAGAGCGCTATA  
 Dr-ECR3 TGTTTGTACAGCTATAAAAAGGATCGAGCTATTGAAAAGTCGTAATAATGAAGCGCGCTATC  
 \*\*\*\*\* \*\* \*\*\*\*\* \*\* \* \*\* \*\*\*\*\* \*\*\*\*\* \*\*\*\*\* \* \*\*\*\*\*

Hs-ECR3 AATCATGCCGCAACATTGTT  
 Lc-ECR3 AATCAGCCAGCAATCTCGTT  
 Dr-ECR3 AATCAGCTGTAACCGTGT  
 \*\*\*\*\* \* \* \*\* \* \*

|                     |       |                                    |
|---------------------|-------|------------------------------------|
| Sequence 1: Hs-ECR3 | 80 bp | Sequences (1:2) Aligned. Score: 82 |
| Sequence 2: Lc-ECR3 | 80 bp | Sequences (1:3) Aligned. Score: 78 |
| Sequence 3: Dr-ECR3 | 80 bp | Sequences (2:3) Aligned. Score: 72 |

D) **ECR4**

Hs-ECR4 CAGAATTACATTTGTTTTCTTGTGATTTTATTTAAAAGTCACTCCTCATCTCCAGAATGC  
 Lc-ECR4 CAGAATTACATTTGTTTTCTTGTGATTTTATTTAAAAGTCACTCCTCATCTCCAGAATGC  
 Cm-ECR4 TAGAATTACATTTGTTTT-CTTGTGATATTATTTAAAAGTCTATCCTCATCTCCAGAGTGC  
 Dr-ECR4 CAGAATTACATTTGTTTTCTTGTGATTTTATTTAAAAGTCACTCCTCATCTCCAGAGCGC  
 \*\*\*\*\*

Hs-ECR4 GTGAAAATATCTACTTTCCACTCAGATACACCGCATTAACCTGTTGGAGGCGAATTTGTT  
 Lc-ECR4 GTGAAAATATCTACTTTCCACTCAGATACACCGCATTAACCTGTTGGAGGCGAATTTGTT  
 Cm-ECR4 GTGAAAATATCTACTTTCCACTCAGATACACCGCATTAACCTGTTGGAGGCGAATTTGTT  
 Dr-ECR4 GTGAAAATGTCTACTTTCCACTCAGATGCGCCGATTAACCTGCGAGGCGCGAGTTTGT  
 \*\*\*\*\*

Hs-ECR4 TGTTTGTCTATTTT-ATTTATTTGCTAGAT---AAGATTGATGCGAGTCTTATTAGC  
 Lc-ECR4 TGT---CTATTTT-ATTTATTTGCTGGAT---AAGATTGATGCGAGTCTTATTAGC  
 Cm-ECR4 TGTTTGTCTATTTTATTTATTTGGGGAGGCGAAGATTGATGTGTTGTTATTATC  
 Dr-ECR4 TGTTTGTCTATTTTATTTATATGCGAGTGT---AAGATTGATGCGAGTCTTATTATC  
 \*\*\* \*\*\*\*\* \*\* \*\*\*\*\* \*\*

|                     |        |                                    |
|---------------------|--------|------------------------------------|
| Sequence 1: Hs-ECR4 | 172 bp | Sequences (1:2) Aligned. Score: 98 |
| Sequence 2: Lc-ECR4 | 168 bp | Sequences (1:3) Aligned. Score: 88 |
| Sequence 3: Dr-ECR4 | 173 bp | Sequences (1:4) Aligned. Score: 90 |
| Sequence 4: Cm-ECR4 | 175 bp | Sequences (2:3) Aligned. Score: 88 |
|                     |        | Sequences (2:4) Aligned. Score: 90 |
|                     |        | Sequences (3:4) Aligned. Score: 85 |

E) **ECR5**

Hs-ECR5 CTGTCACCAAATCACCTGCACGAAACAAGAATCTAATTTGTTAAGCTGGCATGCTGCAG  
 Lc-ECR5 CTGTCACCAAATCACCTGCACGAAACAAGAATCTAATTTGTTAAGCTGGCATTTCTGCAG  
 Cm-ECR5 CTCTCACAAAATCACCTGCACGAAACAAGAATCTAATTTGTTAAGCTGGCATTTCTGTAG  
 Dr-ECR5 CTGTCACCGCATCACCTGCGGAAACAAGAATCTAATTTGTTAAGCTGGCATTTCTGCAG  
 \*\* \*\*\*\* \*\*\*\*\*

Hs-ECR5 ATGGAAGATCGATCTTCTCTGTAGATTTCTCTAATTGAGTGAATATAGACGCC  
 Lc-ECR5 ATGGAAGATCGATTTTCTCTTTAGATTTCTCTAATTGAGTGAATATAGACGCC  
 Cm-ECR5 ATGGAAGATCGATTTTCTCTTTAGAAATTTCTCTAATTGAGTGAATATAGACGCC  
 Dr-ECR5 ATGGACGATCGATTTTCTCTTTAGAAATTTCTCTAATTGAGTGAATATAGACGCC  
 \*\*\*\*\*

|                     |        |                                    |
|---------------------|--------|------------------------------------|
| Sequence 1: Hs-ECR5 | 114 bp | Sequences (1:2) Aligned. Score: 97 |
| Sequence 2: Lc-ECR5 | 114 bp | Sequences (1:3) Aligned. Score: 92 |
| Sequence 3: Dr-ECR5 | 114 bp | Sequences (1:4) Aligned. Score: 92 |
| Sequence 4: Cm-ECR5 | 114 bp | Sequences (2:3) Aligned. Score: 94 |
|                     |        | Sequences (2:4) Aligned. Score: 95 |
|                     |        | Sequences (3:4) Aligned. Score: 92 |

6) **ECR6**

Hs-ECR6 AATGAGACCCCTTTACTCCGTGACGTGCAGCCGCTCCATCTCATTAAGGAAATCGCTCTT  
 Lc-ECR6 AACGAGACCCCTTTACTCCGTGACGTGCAACCGCTCCATCTTATTAAGGAAATCGCTCTT  
 Cm-ECR6 AATGAGACCCCGGACTCCGTGACATGCAGCCGCTCCATCTCATTAAGGAAATCGCTCTT  
 Dr-ECR6 AATGAGGCGCCGACTCCGTGACACCAACCGCTCCATCTCGTTAAGGAAATCGCTCTT  
 Dr-ECR6b AATGGAGGCCAGCTACTCCGTGACTTGCCAAAGCTCATTTCATTACGGTAATCGCCGTC  
 \*\* \* \* \*\*\*\*\* \* \*\*\*\*\* \* \*\* \* \*\*\*\*\* \*

Hs-ECR6 CAATGCTGATTATTTTATTTGAGCCATAATTATATTTCTTTCCGGTAAATCACGGTTTA  
 Lc-ECR6 CAATGCTGATTATTTTATTTGAGCTATAATTATATTTCTTTCCGGTAAATCACGGTTTA  
 Cm-ECR6 CAATGCTGATTATTTTATTTGGAACCCATAATTATATTTCTTTCCGGTAAATCACGGTTTA  
 Dr-ECR6 CAATGCTGATTATTTTATTTGAGCCATAATTATATTTCTTTCCGGTAAATCACGGTCTA  
 Dr-ECR6b CATTGCTGATTATTTTATTTAG-GCCATAATTGTATTCTCCAGATAAATCACGGTTGAA  
 \*\* \*\*\*\*\* \* \*\*\*\*\* \*\* \* \* \*\*\*\*\* \*

Hs-ECR6                   ATCGAGCCACAT--GGAGGGCAGCAGCTAAT  
 Lc-ECR6                   ATCGAGCCACAT--GGAGGGCAACTGGTTTAAAT  
 Cm-ECR6                   ATAGAGCACACGTTTCGGGGGCAAAGCGCTGTAAT  
 Dr-ECR6                   ATCGAGTCCGTTC--GGAGGGCAGCGCTCTAAT  
 Dr-ECR6b                  ATCGGGTCCACAT--GGAGGGCACCAAGTCTAAT  
                           \*\* \* \* \*           \*\* \*\* \*           \*\*\*\*

|                      |        |                                    |
|----------------------|--------|------------------------------------|
| Sequence 1: Hs-ECR6  | 152 bp | Sequences (1:2) Aligned. Score: 94 |
| Sequence 2: Lc-ECR6  | 152 bp | Sequences (1:3) Aligned. Score: 86 |
| Sequence 3: Dr-ECR6  | 152 bp | Sequences (1:4) Aligned. Score: 70 |
| Sequence 4: Dr-ECR6b | 151 bp | Sequences (1:5) Aligned. Score: 84 |
| Sequence 5: Cm-ECR6  | 154 bp | Sequences (2:3) Aligned. Score: 83 |
|                      |        | Sequences (2:4) Aligned. Score: 69 |
|                      |        | Sequences (2:5) Aligned. Score: 80 |
|                      |        | Sequences (3:4) Aligned. Score: 72 |
|                      |        | Sequences (3:5) Aligned. Score: 84 |
|                      |        | Sequences (4:5) Aligned. Score: 59 |
